# Supplementary material
Source: publisher figshare collection journal article supplement (https://sage.figshare.com/ndownloader/files/13193012)
Supplement: Supplementary file 1 [file 13193012]

Chen et al

| Risk of bias                                                                                        |   | Applicability Concerns |
|-----------------------------------------------------------------------------------------------------|---|------------------------|
| Was a consecutive or random sample of patients enrolled?                                            | L | L                      |
| Was a case-control design avoided?                                                                  | L |                        |
| Did the study avoid inappropriate exclusions?                                                       | L |                        |
| Were the index test results interpreted without knowledge of the results of the reference standard? | L | L                      |
| If a threshold was used, was it pre-specified?                                                      | L |                        |
| Is the reference standard likely to correctly classify the target condition?                        | L | L                      |
| Were the reference standard results interpreted without knowledge of the results of the index test? | U |                        |
| Was there an appropriate interval between index test(s) and reference standard?                     | U |                        |
| Did all patients receive a reference standard?                                                      | L |                        |
| Did patients receive the same reference standard?                                                   | L |                        |
| Were all patients included in the analysis?                                                         | L |                        |

Asrani et al

| Risk of bias                                                                                        |   | Applicability Concerns |
|-----------------------------------------------------------------------------------------------------|---|------------------------|
| Was a consecutive or random sample of patients enrolled?                                            | L | L                      |
| Was a case-control design avoided?                                                                  | L |                        |
| Did the study avoid inappropriate exclusions?                                                       | L |                        |
| Were the index test results interpreted without knowledge of the results of the reference standard? | L | L                      |
| If a threshold was used, was it pre-specified?                                                      | L |                        |
| Is the reference standard likely to correctly classify the target condition?                        | L | U                      |
| Were the reference standard results interpreted without knowledge of the results of the index test? | U |                        |
| Was there an appropriate interval between index test(s) and reference standard?                     | L |                        |
| Did all patients receive a reference standard?                                                      | H |                        |
| Did patients receive the same reference standard?                                                   | H |                        |
| Were all patients included in the analysis?                                                         | L |                        |

L:low-risk;H:high-risk;U:unclear

Nazerian et al

| Risk of bias                                                                                        |   | Applicability Concerns |
|-----------------------------------------------------------------------------------------------------|---|------------------------|
| Was a consecutive or random sample of patients enrolled?                                            | L | H                      |
| Was a case-control design avoided?                                                                  | H |                        |
| Did the study avoid inappropriate exclusions?                                                       | U |                        |
| Were the index test results interpreted without knowledge of the results of the reference standard? | L | L                      |
| If a threshold was used, was it pre-specified?                                                      | L |                        |
| Is the reference standard likely to correctly classify the target condition?                        | L | U                      |
| Were the reference standard results interpreted without knowledge of the results of the index test? | U |                        |
| Was there an appropriate interval between index test(s) and reference standard?                     | U |                        |
| Did all patients receive a reference standard?                                                      | H |                        |
| Did patients receive the same reference standard?                                                   | H |                        |
| Were all patients included in the analysis?                                                         | L |                        |

L:low-risk;H:high-risk;U:unclear

Schleder et al

| Risk of bias                                                                                        |   | Applicability Concerns |
|-----------------------------------------------------------------------------------------------------|---|------------------------|
| Was a consecutive or random sample of patients enrolled?                                            | L | U                      |
| Was a case-control design avoided?                                                                  | L |                        |
| Did the study avoid inappropriate exclusions?                                                       | L |                        |
| Were the index test results interpreted without knowledge of the results of the reference standard? | L | L                      |
| If a threshold was used, was it pre-specified?                                                      | L |                        |
| Is the reference standard likely to correctly classify the target condition?                        | U | U                      |
| Were the reference standard results interpreted without knowledge of the results of the index test? | U |                        |
| Was there an appropriate interval between index test(s) and reference standard?                     | U |                        |
| Did all patients receive a reference standard?                                                      | H |                        |
| Did patients receive the same reference standard?                                                   | H |                        |
| Were all patients included in the analysis?                                                         | L |                        |

L:low-risk;H:high-risk;U:unclear

Yoshihiro et al

| Risk of bias                                                                                        |   | Applicability Concerns |
|-----------------------------------------------------------------------------------------------------|---|------------------------|
| Was a consecutive or random sample of patients enrolled?                                            | L | U                      |
| Was a case-control design avoided?                                                                  | L |                        |
| Did the study avoid inappropriate exclusions?                                                       | H |                        |
| Were the index test results interpreted without knowledge of the results of the reference standard? | L | L                      |
| If a threshold was used, was it pre-specified?                                                      | L |                        |
| Is the reference standard likely to correctly classify the target condition?                        | U | U                      |
| Were the reference standard results interpreted without knowledge of the results of the index test? | U |                        |
| Was there an appropriate interval between index test(s) and reference standard?                     | U |                        |
| Did all patients receive a reference standard?                                                      | H |                        |
| Did patients receive the same reference standard?                                                   | H |                        |
| Were all patients included in the analysis?                                                         | L |                        |

L:low-risk;H:high-risk;U:unclear
